# Supplementary material
Source: publisher figshare collection journal article supplement (https://sage.figshare.com/ndownloader/files/21509790)
Supplement: Supplementary file 1 [file 21509790]

## Supplementary Materials:

Table 5.

## Frequency of Special Education Legislative and Electoral Advocacy Activities by Racial/Ethnic Background

| <i>Have you conducted the following special education legislative activities...</i> | <i>Yes, I have</i> |
|-------------------------------------------------------------------------------------|--------------------|
| Engaged in another form of special education legislative advocacy (write-in)        |                    |
| White                                                                               | 55.7% (34)         |
| African American                                                                    | 40.0% (10)         |
| Latino                                                                              | 40.0% (10)         |
| Asian American                                                                      | 33.3% (2)          |
| Other                                                                               | 40% (4)            |
| E-mailed a legislator about special education                                       |                    |
| White                                                                               | 52.5% (32)         |
| African American                                                                    | 40% (10)           |
| Latino                                                                              | 28.0% (7)          |
| Asian American                                                                      | 33.3% (2)          |
| Other                                                                               | 50% (5)            |
| Told another parent about the IDEA reauthorization                                  |                    |
| White                                                                               | 37.7% (23)         |
| African American                                                                    | 32.0% (8)          |
| Latino                                                                              | 36.0% (9)          |
| Asian American                                                                      | 50.0% (3)          |
| Other                                                                               | 30% (3)            |
| Called a legislator about special education                                         |                    |
| White                                                                               | 41% (25)           |
| African American                                                                    | 56.0% (14)         |
| Latino                                                                              | 12.0% (3)          |
| Asian American                                                                      | 16.7% (1)          |
| Other                                                                               | 40% (4)            |
| Visited a legislator about special education                                        |                    |

|                                                                                                                        |                                              |
|------------------------------------------------------------------------------------------------------------------------|----------------------------------------------|
| White                                                                                                                  | 42.6% (26)                                   |
| African American                                                                                                       | 32.0% (8)                                    |
| Latino                                                                                                                 | 16.0% (4)                                    |
| Asian American                                                                                                         | 66.7% (4)                                    |
| Other                                                                                                                  | 10% (1)                                      |
| Spoken to a parent support group about the IDEA reauthorization                                                        |                                              |
| White                                                                                                                  | 29.5% (18)                                   |
| African American                                                                                                       | 40% (10)                                     |
| Latino                                                                                                                 | 24.0% (6)                                    |
| Asian American                                                                                                         | 66.7% (4)                                    |
| Other                                                                                                                  | 30% (3)                                      |
| Written to the newspaper (or alternate form of media including Facebook, Twitter, etc.) about the IDEA reauthorization |                                              |
| White                                                                                                                  | 18.0% (11)                                   |
| African American                                                                                                       | 20.0% (5)                                    |
| Latino                                                                                                                 | 12.0% (3)                                    |
| Asian American                                                                                                         | ---                                          |
| Other                                                                                                                  | 20% (2)                                      |
| <i>Have you conducted the following electoral advocacy activities...</i>                                               |                                              |
|                                                                                                                        | No, never      Yes, usually      Yes, always |
| Are you registered in your election district?                                                                          |                                              |
| White                                                                                                                  | ---      14.8% (9)      80.3% (49)           |
| African American                                                                                                       | 4.0% (1)      8.0% (2)      84.0% (21)       |
| Latino                                                                                                                 | 44.0% (11)      12.0% (3)      32.0% (8)     |
| Asian American                                                                                                         | 33.3% (2)      33.3% (2)      16.7% (1)      |
| Other                                                                                                                  | 30% (3)      10% (1)      50% (5)            |
| Do you vote in national and local elections?                                                                           |                                              |
| White                                                                                                                  | ---      47.5% (29)      47.5% (29)          |
| African American                                                                                                       | ---      12.0% (3)      80.0% (20)           |
| Latino                                                                                                                 | 48.0% (12)      12.0% (3)      28.0% (7)     |
| Asian American                                                                                                         | 33.3% (2)      16.7% (1)      33.3% (2)      |
| Other                                                                                                                  | 30% (3)      20% (2)      40% (4)            |
| Have you volunteered for a political organization or candidate running for office?                                     |                                              |

|                                                                                                                                       |            |            |           |
|---------------------------------------------------------------------------------------------------------------------------------------|------------|------------|-----------|
| White                                                                                                                                 | 62.3% (38) | 29.5% (18) | 3.3% (2)  |
| African American                                                                                                                      | 56.0% (14) | 12.0% (3)  | 28.0% (7) |
| Latino                                                                                                                                | 72.0% (18) | 8.0% (2)   | 8.0% (2)  |
| Asian American                                                                                                                        | 50.0% (3)  | 33.3% (2)  | ---       |
| Other                                                                                                                                 | 60% (6)    | 10% (1)    | 20% (2)   |
| Have you given money to a candidate, political party, or organization that supported candidates?                                      |            |            |           |
| White                                                                                                                                 | 54.1% (33) | 32.8% (20) | 8.6% (5)  |
| African American                                                                                                                      | 48.0% (12) | 28.0% (7)  | 16.0% (4) |
| Latino                                                                                                                                | 76.0% (19) | 8.0% (2)   | 4.0% (1)  |
| Asian American                                                                                                                        | 66.7% (4)  | 16.7% (1)  | ---       |
| Other                                                                                                                                 | 70% (7)    | 10% (1)    | 10% (1)   |
| When there is an election taking place, do you try to convince people to vote for or against one of the parties or candidates or not? |            |            |           |
| White                                                                                                                                 | 32.8% (20) | 55.7% (34) | 6.6% (4)  |
| African American                                                                                                                      | 52.0% (13) | 24.0% (6)  | 16.0% (4) |
| Latino                                                                                                                                | 64.0% (16) | 24.0% (6)  | ---       |
| Asian American                                                                                                                        | 33.3% (2)  | 33.3% (2)  | 16.7% (1) |
| Other                                                                                                                                 | 30% (3)    | 50% (5)    | 10% (1)   |
| Do you wear a campaign button, put a sticker on your car or place a sign in front of your house?                                      |            |            |           |
| White                                                                                                                                 | 47.5% (29) | 37.7% (23) | 8.2% (5)  |
| African American                                                                                                                      | 40.0% (10) | 32.0% (8)  | 20.0% (5) |
| Latino                                                                                                                                | 68.0% (17) | 20.0% (5)  | ---       |
| Asian American                                                                                                                        | 33.3% (2)  | 50.0% (3)  | ---       |
| Other                                                                                                                                 | 60% (6)    | 30% (3)    | ---       |

## Supplementary Materials:

Table 6.

## Frequency of Civic and Political Activities by Racial/Ethnic Background

|                                                                                               | No, never  | Yes, but not within<br>the last 12 months | Yes, within the<br>last 12 months |
|-----------------------------------------------------------------------------------------------|------------|-------------------------------------------|-----------------------------------|
| <i>Civic Activities</i>                                                                       |            |                                           |                                   |
| Worked together with someone or some group to solve a problem in the community where you live |            |                                           |                                   |
| White                                                                                         | 13.1% (8)  | 19.7% (12)                                | 62.3% (38)                        |
| African American                                                                              | 16.0% (4)  | 20.0% (5)                                 | 56.0% (14)                        |
| Latino                                                                                        | 28.0% (7)  | 20.0% (5)                                 | 40.0% (10)                        |
| Asian American                                                                                | ---        | 16.7% (1)                                 | 66.7% (4)                         |
| Other                                                                                         | 20% (2)    | 60% (6)                                   | 10% (1)                           |
| Volunteered or done any voluntary community service for no pay                                |            |                                           |                                   |
| White                                                                                         | 8.2% (5)   | 11.5% (7)                                 | 75.4% (46)                        |
| African American                                                                              | 8.0% (2)   | 20.0% (5)                                 | 64.0% (16)                        |
| Latino                                                                                        | 36.0% (9)  | 24.0% (6)                                 | 28.0% (7)                         |
| Asian American                                                                                | ---        | 16.7% (1)                                 | 66.7% (4)                         |
| Other                                                                                         | 10% (1)    | 40% (4)                                   | 40% (4)                           |
| Volunteered with a religious group                                                            |            |                                           |                                   |
| White                                                                                         | 37.7% (23) | 24.6% (15)                                | 29.5% (18)                        |
| African American                                                                              | 8.0% (2)   | 32.0% (8)                                 | 52.0% (13)                        |
| Latino                                                                                        | 44.0% (11) | 12.0% (3)                                 | 32.0% (8)                         |
| Asian American                                                                                | 50.0% (3)  | 33.3% (2)                                 | 83.3% (5)                         |
| Other                                                                                         | 50% (5)    | 20% (2)                                   | 20% (2)                           |
| Volunteered with an environmental organization                                                |            |                                           |                                   |
| White                                                                                         | 50.8% (31) | 34.4% (21)                                | 9.8% (6)                          |
| African American                                                                              | 52.0% (13) | 24.0% (6)                                 | 16.0% (4)                         |
| Latino                                                                                        | 44.0% (11) | 12.0% (3)                                 | 32.0% (8)                         |
| Asian American                                                                                | 33.3% (2)  | 50.0% (3)                                 | ---                               |
| Other                                                                                         | 30% (3)    | 40% (4)                                   | 20% (2)                           |

---

|                                                                                                                         |            |            |            |
|-------------------------------------------------------------------------------------------------------------------------|------------|------------|------------|
| Volunteered with a civic or community organization involved in health or social services                                |            |            |            |
| White                                                                                                                   | 24.6% (15) | 19.7% (12) | 47.5% (29) |
| African American                                                                                                        | 32.0% (8)  | 36.0% (9)  | 24.0% (6)  |
| Latino                                                                                                                  | 52.0% (13) | 16.0% (4)  | 20.0% (5)  |
| Asian American                                                                                                          | 16.7% (1)  | 16.7% (1)  | 50.0% (3)  |
| Other                                                                                                                   | 30% (3)    | 40% (4)    | 20% (2)    |
| Volunteered with an organization for youth, children, or education                                                      |            |            |            |
| White                                                                                                                   | 14.8% (9)  | 8.2% (5)   | 72.1% (44) |
| African American                                                                                                        | 16.0% (4)  | 32.0% (8)  | 44.0% (11) |
| Latino                                                                                                                  | 28.0% (7)  | 20.0% (5)  | 40.0% (10) |
| Asian American                                                                                                          | 16.7% (1)  | 16.7% (1)  | 50.0% (3)  |
| Other                                                                                                                   | 30% (3)    | 20% (2)    | 40% (4)    |
| Volunteered with any other group                                                                                        |            |            |            |
| White                                                                                                                   | 24.6% (15) | 13.1% (8)  | 55.7% (34) |
| African American                                                                                                        | 24.0% (6)  | 24.0% (6)  | 40.0% (10) |
| Latino                                                                                                                  | 24.0% (6)  | 28.0% (7)  | 36.0% (9)  |
| Asian American                                                                                                          | ---        | 50.0% (3)  | 33.3% (2)  |
| Other                                                                                                                   | 30% (3)    | 20% (2)    | 40% (4)    |
| Personally walked, ran, or bicycled for a charitable cause—this is separate from sponsoring or giving money to an event |            |            |            |
| White                                                                                                                   | 24.6% (15) | 36.1% (22) | 34.4% (21) |
| African American                                                                                                        | 20.0% (5)  | 32.0% (8)  | 40.0% (10) |
| Latino                                                                                                                  | 52.0% (13) | 12.0% (3)  | 24.0% (6)  |
| Asian American                                                                                                          | ---        | 50.0% (3)  | 33.3% (2)  |
| Other                                                                                                                   | 50% (5)    | 30% (3)    | 10% (1)    |
| Besides donating money, have you ever done anything else to help raise money for a charitable cause                     |            |            |            |
| White                                                                                                                   | 19.7% (12) | 27.9% (17) | 45.9% (28) |
| African American                                                                                                        | 24.0% (6)  | 36.0% (9)  | 36.0% (9)  |
| Latino                                                                                                                  | 40.0% (10) | 16.0% (4)  | 28.0% (7)  |
| Asian American                                                                                                          | 16.7% (1)  | 16.7% (1)  | 50.0% (3)  |
| Other                                                                                                                   | 20% (2)    | 30% (3)    | 40% (4)    |

---

---

*Political Activities*

Contacted a newspaper or magazine to express your opinion on an issue

|                  |            |            |           |
|------------------|------------|------------|-----------|
| White            | 52.5% (32) | 24.6% (15) | 14.8% (9) |
| African American | 72.0% (18) | 4.0% (1)   | 20.0% (5) |
| Latino           | 60.0% (15) | 20.0% (5)  | 4.0% (1)  |
| Asian American   | 66.7% (4)  | 16.7% (1)  | ---       |
| Other            | 40% (4)    | 30% (3)    | 20% (2)   |

Called or visited a public official to express your opinion on a political issue

|                  |            |            |            |
|------------------|------------|------------|------------|
| White            | 16.4% (10) | 29.5% (18) | 45.9% (28) |
| African American | 40.0% (10) | 24.0% (6)  | 32.0% (8)  |
| Latino           | 56.0% (14) | 12.0% (3)  | 16.0% (4)  |
| Asian American   | 16.7% (1)  | 16.7% (1)  | 50.0% (3)  |
| Other            | 40% (4)    | 30% (3)    | 20% (2)    |

Called in to a radio or television talk show to express your opinion on a political issue even if you did not get on the air

|                  |            |           |           |
|------------------|------------|-----------|-----------|
| White            | 77.0% (47) | 9.8% (6)  | 4.9% (3)  |
| African American | 56.0% (14) | 20.0% (5) | 20.0% (5) |
| Latino           | 68.0% (17) | 8.0% (2)  | 8.0% (2)  |
| Asian American   | 66.7% (4)  | 16.7% (1) | ---       |
| Other            | 50% (5)    | 10% (1)   | 30% (3)   |

Take part in a protest, march, or demonstration

|                  |            |            |            |
|------------------|------------|------------|------------|
| White            | 37.7% (23) | 27.9% (17) | 24.6% (15) |
| African American | 48.0% (12) | 20.0% (5)  | 24.0% (6)  |
| Latino           | 48.0% (12) | 8.0% (2)   | 24.0% (6)  |
| Asian American   | 50.0% (3)  | 16.7% (1)  | 16.7% (1)  |
| Other            | 50% (5)    | 20% (2)    | 20% (2)    |

Signed an e-mail petition about a social or political issue

|                  |            |            |            |
|------------------|------------|------------|------------|
| White            | 16.4% (10) | 31.1% (19) | 44.3% (27) |
| African American | 28.0% (7)  | 32.0% (8)  | 36.0% (9)  |
| Latino           | 40.0% (10) | 16.0% (4)  | 24.0% (6)  |
| Asian American   | 16.7% (1)  | 50.0% (3)  | 16.7% (1)  |
| Other            | 20.0% (2)  | 10% (1)    | 60% (6)    |

---

---

|                                                                                                                                      |            |            |            |
|--------------------------------------------------------------------------------------------------------------------------------------|------------|------------|------------|
| Signed a written petition about a political or social issue                                                                          |            |            |            |
| White                                                                                                                                | 24.6% (15) | 24.6% (15) | 41.0% (25) |
| African American                                                                                                                     | 32.0% (8)  | 36.0% (9)  | 24.0% (6)  |
| Latino                                                                                                                               | 48.0% (12) | 8.0% (2)   | 28.0% (7)  |
| Asian American                                                                                                                       | 66.7% (4)  | 16.7% (1)  | ---        |
| Other                                                                                                                                | 10% (1)    | 20% (2)    | 60% (6)    |
| Not bought something from a certain company because you disagree with the social or political values of the company that produces it |            |            |            |
| White                                                                                                                                | 14.8% (9)  | 21.3% (13) | 55.7% (34) |
| African American                                                                                                                     | 20.0% (5)  | 24.0% (6)  | 52.0% (13) |
| Latino                                                                                                                               | 48.0% (12) | 12.0% (3)  | 20.0% (5)  |
| Asian American                                                                                                                       | 16.7% (1)  | 33.3% (2)  | 33.3% (2)  |
| Other                                                                                                                                | 20% (2)    | 20% (2)    | 50% (5)    |
| Bought something because you like the social or political values of the company that produces it or provides it                      |            |            |            |
| White                                                                                                                                | 21.3% (13) | 13.1% (8)  | 57.4% (35) |
| African American                                                                                                                     | 24.0% (6)  | 32.0% (8)  | 40.0% (10) |
| Latino                                                                                                                               | 52.0% (13) | 8.0% (2)   | 24.0% (6)  |
| Asian American                                                                                                                       | 33.3% (2)  | 16.7% (1)  | 33.3% (2)  |
| Other                                                                                                                                | 30% (3)    | 30% (3)    | 30% (3)    |
| Worked as a canvasser—going door to door for a political or social group or candidate                                                |            |            |            |
| White                                                                                                                                | 70.5% (43) | 18.0% (11) | 3.3% (2)   |
| African American                                                                                                                     | 76.0% (19) | 4.0% (1)   | 16.0% (4)  |
| Latino                                                                                                                               | 68.0% (17) | 12.0% (3)  | 80.0% (20) |
| Asian American                                                                                                                       | 66.7% (4)  | 16.7% (1)  | ---        |
| Other                                                                                                                                | 70% (7)    | 20% (2)    | ---        |

---

### Focus Group Protocol

Introduce yourself. Briefly describe your connection to the field and the project. Specify your connection to family advocacy especially. I want to thank all of you for coming. I hope that each of you enjoys our discussion. I'm going to go over some ground rules before we start. We hope that this will be a lively discussion among all of us. We ask that you respect the **confidentiality** of the information that is shared here so that everyone can feel open to exchange your opinions, feelings, and beliefs. We also ask that the information discussed here will stay here and not be shared with others outside of the room. **If you need to get up** in the course of the conversation, feel free to do so. This is an informal discussion, so if you need to leave the room for a while, or if you have to get up and get a drink or you need to move around a little bit because you get stiff, feel free to do that. Last, there are **no right or wrong answers** here. We want to hear different points of view, so if your view on a topic differs from the views of others around the table, we need to hear that too. Group members do not have to agree, but everyone should listen respectfully as others share their views.

1. When you think about special education and the services your child receives, what would you change?
2. Do you feel like you can affect change for your own child's services?
  - a. How have you (or could you)?
  - b. What are the barriers?
3. Do you feel like you can affect change in the special education system (for other children with disabilities)?
  - a. How have you (or could you)?
  - b. What are the barriers to affecting systemic change?
4. How do you feel when interacting with school professionals (educators, administrators)?
  - a. Do you initiate contact with school professionals? For what reasons?
    - i. If yes, how did you contact them and what was the result of the contact?
  - b. Do you feel that they listen to your concerns?
  - c. What barriers do you face in contacting school professionals?
5. How do you feel about legislators (people who write and pass laws, usually politicians and elected officials)?
  - a. Have you ever contacted a legislator? Why?
    - i. If yes, how did you contact them and what was the result of the contact?
  - b. Do you feel that they listen to your concerns?
  - c. What barriers do you face in contacting legislators?
6. How do you feel about this advocacy expectation for parents in special education?
  - a. How do you feel about the advocacy expectation for your own child?
  - b. How do you feel about the advocacy expectation for systemic change?
7. Is there anything else you would like to add?
